# Supplementary material for: Influence of the enzyme concentration on the phase behaviour for developing a homogeneous enzymatic reaction in ionic liquid–CO2 media
Source: Royal Society of Chemistry journal article supplement (doi:10.1039/b805011b), 2008-01-01
Supplement: b805011b.pdf [file b805011b.pdf]

Electronic Supplementary Information (ESI)

Table 1. Bubble points of the system CO<sub>2</sub>+HOPMImNO<sub>3</sub>+CaL B for a concentration of 0.5 U Cal B/mL HOPMImNO<sub>3</sub> (3% wt, 40 mg/mL)

| C <sub>CaL B</sub> = 3.03% wt |         | C <sub>CaL B</sub> = 3.04% wt |         | C <sub>CaL B</sub> = 3.03% wt |         | C <sub>CaL B</sub> = 3.03% wt |         |
|-------------------------------|---------|-------------------------------|---------|-------------------------------|---------|-------------------------------|---------|
| X <sub>CO2</sub> =            | 5.18%   | X <sub>CO2</sub> =            | 10.35%  | X <sub>CO2</sub> =            | 14.73%  | X <sub>CO2</sub> =            | 20.65%  |
| T (K)                         | P (MPa) |
| 303.38                        | 0.797   | 303.44                        | 1.820   | 303.52                        | 2.533   | 303.52                        | 3.966   |
| 308.58                        | 0.873   | 308.54                        | 2.000   | 308.71                        | 2.757   | 308.51                        | 4.442   |
| 313.51                        | 0.972   | 313.35                        | 2.180   | 313.54                        | 3.133   | 313.38                        | 4.990   |
| 318.46                        | 1.053   | 318.49                        | 2.360   | 318.58                        | 3.427   | 318.51                        | 5.512   |
| 323.54                        | 1.158   | 323.55                        | 2.575   | 323.50                        | 3.788   | 323.52                        | 6.146   |
| 328.55                        | 1.248   | 328.50                        | 2.790   | 328.60                        | 4.133   | 328.53                        | 6.752   |
| 333.51                        | 1.353   | 333.53                        | 3.020   | 333.51                        | 4.508   | 333.49                        | 7.467   |
| 338.50                        | 1.458   | 338.57                        | 3.250   | 338.62                        | 4.923   | 338.63                        | 8.212   |
| 343.58                        | 1.573   | 343.59                        | 3.505   | 343.55                        | 5.323   | 343.56                        | 8.997   |
| 348.58                        | 1.688   | 348.52                        | 3.760   | 348.57                        | 5.758   | 348.60                        | 9.877   |

Table 2. Bubble points of the system CO<sub>2</sub>+HOPMImNO<sub>3</sub>+CaL B for a concentration of 1 U Cal B/mL HOPMImNO<sub>3</sub> (6 % wt, 80 mg/mL)

| C <sub>CaL B</sub> = 6.91% wt |         | C <sub>CaL B</sub> = 5.70% wt |         | C <sub>CaL B</sub> = 6.06% wt |         | C <sub>CaL B</sub> = 6.91% wt |         | C <sub>CaL B</sub> = 5.17% wt |         | C <sub>CaL B</sub> = 7.62% wt |         |
|-------------------------------|---------|-------------------------------|---------|-------------------------------|---------|-------------------------------|---------|-------------------------------|---------|-------------------------------|---------|
| X <sub>CO2</sub> =            | 5.24%   | X <sub>CO2</sub> =            | 10.37%  | X <sub>CO2</sub> =            | 10.21%  | X <sub>CO2</sub> =            | 11.24%  | X <sub>CO2</sub> =            | 15.41%  | X <sub>CO2</sub> =            | 21.03%  |
| T (K)                         | P (MPa) |
| 303.50                        | 0.773   | 303.59                        | 1.78    | 303.57                        | 1.738   | 303.43                        | 1.895   | 303.53                        | 2.706   | 303.49                        | 4.193   |
| 308.52                        | 0.863   | 308.49                        | 1.95    | 308.57                        | 1.903   | 308.54                        | 2.085   | 308.55                        | 3.001   | 308.50                        | 4.693   |
| 313.51                        | 0.958   | 313.51                        | 2.16    | 313.51                        | 2.093   | 313.51                        | 2.305   | 313.57                        | 3.331   | 313.51                        | 5.261   |
| 318.49                        | 1.043   | 318.63                        | 2.35    | 318.51                        | 2.293   | 318.41                        | 2.515   | 318.58                        | 3.656   | 318.47                        | 5.843   |
| 323.46                        | 1.139   | 323.52                        | 2.57    | 323.48                        | 2.503   | 323.44                        | 2.770   | 323.56                        | 4.036   | 323.45                        | 6.488   |
| 328.48                        | 1.238   | 328.57                        | 2.78    | 328.54                        | 2.718   | 328.46                        | 3.010   | 328.52                        | 4.406   | 328.52                        | 7.198   |
| 333.57                        | 1.344   | 333.57                        | 3.02    | 333.55                        | 2.938   | 333.54                        | 3.275   | 333.54                        | 4.841   | 333.54                        | 7.952   |
| 338.48                        | 1.438   | 338.57                        | 3.26    | 338.57                        | 3.198   | 338.53                        | 3.540   | 338.54                        | 5.236   | 338.50                        | 8.733   |
| 343.54                        | 1.549   | 343.45                        | 3.52    | 343.61                        | 3.458   | 343.43                        | 3.820   | 343.48                        | 5.681   | 343.53                        | 9.588   |
| 348.52                        | 1.673   | 348.52                        | 3.77    | 348.54                        | 3.698   | 348.59                        | 4.115   | 348.58                        | 6.146   | 348.54                        | 10.492  |

Table 3. Bubble points of the system CO<sub>2</sub>+HOPMImNO<sub>3</sub>+CaL B for a concentration of 1.5 U Cal B/mL HOPMImNO<sub>3</sub> (9.30 % wt, 128 mg/mL)

| <b>C<sub>CaLB</sub> =</b> | <b>9.30% wt</b> |
|---------------------------|-----------------|---------------------------|-----------------|---------------------------|-----------------|---------------------------|-----------------|
| <b>X<sub>CO2</sub>=</b>   | <b>5.09%</b>    | <b>X<sub>CO2</sub>=</b>   | <b>10.29%</b>   | <b>X<sub>CO2</sub>=</b>   | <b>16.21%</b>   | <b>X<sub>CO2</sub>=</b>   | <b>20.52%</b>   |
| <b>T (K)</b>              | <b>P (MPa)</b>  |
| 0.972                     | 313.44          | 2.125                     | 313.47          | 3.664                     | 313.50          | 5.069                     | 313.53          |
| 1.147                     | 323.44          | 2.555                     | 323.55          | 4.429                     | 323.49          | 6.259                     | 323.60          |
| 1.352                     | 333.48          | 3.010                     | 333.52          | 2.974                     | 303.53          | 7.589                     | 333.56          |
| 1.572                     | 343.54          | 3.510                     | 343.57          | 3.299                     | 308.57          | 4.020                     | 303.48          |
| 1.687                     | 348.57          | 3.770                     | 348.49          | 4.049                     | 318.56          | 4.515                     | 308.58          |
| 0.797                     | 303.48          | 1.750                     | 303.52          | 4.810                     | 328.48          | 5.615                     | 318.57          |
| 0.882                     | 308.57          | 1.935                     | 308.57          | 5.250                     | 333.54          | 6.870                     | 328.49          |
| 1.057                     | 318.56          | 2.335                     | 318.51          | 5.700                     | 338.49          | 8.314                     | 338.57          |
| 1.247                     | 328.54          | 2.775                     | 328.53          | 6.175                     | 343.56          | 9.100                     | 343.56          |
| 1.462                     | 338.56          | 3.255                     | 338.49          | 6.666                     | 348.58          | 9.935                     | 348.60          |

Table 4. Bubble points of the system CO<sub>2</sub>+HOPMImNO<sub>3</sub>+CaL B for a concentration of 2 U Cal B/mL HOPMImNO<sub>3</sub> (11.9 % wt, 171 mg/mL)

| <b>C<sub>CaLB</sub> =</b> | <b>11.86% wt</b> |
|---------------------------|------------------|---------------------------|------------------|---------------------------|------------------|---------------------------|------------------|
| <b>X<sub>CO2</sub>=</b>   | <b>5.02%</b>     | <b>X<sub>CO2</sub>=</b>   | <b>10.33%</b>    | <b>X<sub>CO2</sub>=</b>   | <b>15.52%</b>    | <b>X<sub>CO2</sub>=</b>   | <b>19.93%</b>    |
| <b>T (K)</b>              | <b>P (MPa)</b>   |
| 303.54                    | 0.848            | 303.48                    | 1.791            | 303.43                    | 2.947            | 303.56                    | 4.162            |
| 308.75                    | 0.933            | 308.49                    | 1.957            | 308.49                    | 3.231            | 308.36                    | 4.497            |
| 313.56                    | 0.998            | 313.47                    | 2.146            | 313.57                    | 3.571            | 313.44                    | 5.057            |
| 318.47                    | 1.088            | 318.54                    | 2.347            | 318.51                    | 3.931            | 318.59                    | 5.502            |
| 323.48                    | 1.203            | 323.54                    | 2.566            | 323.54                    | 4.311            | 323.55                    | 6.117            |
| 328.51                    | 1.278            | 328.59                    | 2.792            | 328.56                    | 4.711            | 328.55                    | 6.622            |
| 333.52                    | 1.398            | 333.54                    | 3.027            | 333.49                    | 5.162            | 333.57                    | 7.317            |
| 338.51                    | 1.483            | 338.50                    | 3.262            | 338.47                    | 5.611            | 338.45                    | 7.887            |
| 343.56                    | 1.598            | 343.54                    | 3.532            | 343.62                    | 6.047            | 343.55                    | 8.612            |
| 348.52                    | 1.693            | 348.58                    | 3.777            | 348.55                    | 6.511            | 348.44                    | 9.267            |
